# Supplementary material for: Homeostatic medicine, new thinking on etiological treatment of large cyst-like periapical lesions: Case series and literature review
Source: Research Square preprint supplement (doi:10.21203/rs.3.rs-6760722/v1), 2025-06-18
Supplement: Supplementary file 1 [file 2f2986152012602e45e26ffa.docx]

**Supplemental Table 2: Reasons for Exclusion of 12 Articles**

| **#** | **Article** | **Inclusion criteria not fulfilled or other reasons for exclusion** |
| --- | --- | --- |
| **1** | Ozan U, Er K. Endodontic treatment of a large cyst-like periradicular lesion using a combination of antibiotic drugs: a case report. J Endod. 2005 Dec;31(12):898-900. doi: 10.1097/01.don.0000164129.74235.8e. PMID: 16306827. | Lesion size was not provided. |
| **2** | Saatchi M. Healing of large periapical lesion: a non-surgical endodontic treatment approach. Aust Endod J. 2007 Dec;33(3):136-40. doi: 10.1111/j.1747-4477.2007.00061.x. PMID: 18076582. | Lesion size was not provided. |
| **3** | Martin SA. Conventional endodontic therapy of upper central incisor combined with cyst decompression: a case report. J Endod. 2007 Jun;33(6):753-7. doi: 10.1016/j.joen.2007.01.013. Epub 2007 Mar 21. PMID: 17509421. | Lesion size was not provided. |
| **4** | Kusgoz A, Yildirim T, Er K, Arslan I. Retreatment of a resected tooth associated with a large periradicular lesion by using a triple antibiotic paste and mineral trioxide aggregate: a case report with a thirty-month follow-up. J Endod. 2009 Nov;35(11):1603-6. doi: 10.1016/j.joen.2009.07.019. Epub 2009 Sep 23. PMID: 19840657. | Lesion size was not provided. |
| **5** | Dhillon JS, Amita, Saini SK, Bedi HS, Ratol SS, Gill B. Healing of a large periapical lesion using triple antibiotic paste and intracanal aspiration in nonsurgical endodontic retreatment. Indian J Dent. 2014 Jul;5(3):161-5. doi: 10.4103/0975-962X.140843. PMID: 25565747; PMCID: PMC4213876. | Lesion size was not provided. |
| **6** | Saoud TM, Sigurdsson A, Rosenberg PA, Lin LM, Ricucci D. Treatment of a large cystlike inflammatory periapical lesion associated with mature necrotic teeth using regenerative endodontic therapy. J Endod. 2014 Dec;40(12):2081-6. doi: 10.1016/j.joen.2014.07.027. Epub 2014 Oct 5. PMID: 25292168. | Regenerative endodontics excluded. |
| **7** | Kahler B. Healing of a cyst-like lesion involving an implant with nonsurgical management. J Endod. 2015 May;41(5):749-52. doi: 10.1016/j.joen.2014.12.013. Epub 2015 Jan 30. PMID: 25649297. | Lesion size was not provided. |
| **8** | Sood N, Maheshwari N, Gothi R, Sood N. Treatment of Large Periapical Cyst Like Lesion: A Noninvasive Approach: A Report of Two Cases. Int J Clin Pediatr Dent. 2015 May-Aug;8(2):133-7. doi: 10.5005/jp-journals-10005-1299. Epub 2015 Aug 11. PMID: 26379382; PMCID: PMC4562047. | Lesion size was not provided. |
| **9** | Ghorbanzadeh S, Ashraf H, Hosseinpour S, Ghorbanzadeh F. Nonsurgical Management of a Large Periapical Lesion: A Case Report. Iran Endod J. 2017 Spring;12(2):253-256. doi: 10.22037/iej.2017.49. PMID: 28512496; PMCID: PMC5431729. | Lesion size was not provided. |
| **10** | Dembinskaite A, Veberiene R, Machiulskiene V. Successful treatment of dens invaginatus type 3 with infected invagination, vital pulp, and cystic lession: A case report. Clin Case Rep. 2018 Jun 25;6(8):1565-1570. doi: 10.1002/ccr3.1647. PMID: 30147906; PMCID: PMC6099029. | Lesion size was not provided. |
| **11** | Hristov K, Gateva N. Conservative treatment of a tooth with incomplete root development and a large periapical lesion - a case report. J of IMAB. 2021 Apr-Jun;27(1):3747-3751. DOI: 10.5272/jimab.2021272.3747 | Regenerative endodontics excluded. |
| **12** | Quaresma SA, Costa RPD, Batalha B, Quaresma MCRD, Lopes FC, Mazzi-Chaves JF, Ginjeira A, Sousa-Neto MD. Management of periapical lesion with persistent exsudate. Braz Dent J. 2022 Jan-Feb;33(1):112-118. doi: 10.1590/0103-6440202204818. PMID: 35262549; PMCID: PMC9645141. | Lesion size was not provided. |
