# Supplementary material for: Homeostatic medicine, new thinking on etiological treatment of large cyst-like periapical lesions: Case series and literature review
Source: Research Square preprint supplement (doi:10.21203/rs.3.rs-6760722/v1), 2025-06-18
Supplement: Supplementary file 2 [file 4b79f83b6523fba508531fe1.xlsx]

## Sheet: ≥20mm
Table 2. Studies in LCPLs‘ diameter over 20 mm.
Author （year）	Study design a	Sample size	Age (y)	Cause	Tooth type	Extent of periapical radiolucency (mm)	Drainage/Orthograde decompression	Calcium hydroxide intracanal dressing	Outcome assessment b	Outcome c	Follow-up	≥ 4 year follow-up	Reason for failure	Conclusion
Ulku Ozan et al. (2005)	CR	1	15-year-old	No mention.	Right mandibular first molar.	Approximately 3.5 cm in maximum diameter.	A clear, straw-colored fluid was exuded from the canals. Aspiration of this fluid from inside root canals was made directly into a syringe with a 22-gauge needle.	A mixture of ciprofloxacin, metronidazole, and minocycline paste was prepared into a creamy consistency and spun down the canal with a lentulo spiral instrument into the canal for 2 months.	C & R	S	7 months	No	None	Root canal treatment using a combination of antibiotic drugs as an antibacterial dressing was successful in healing large cyst-like perira_x0002_dicular lesions.
Soares et al. (2006）	CR	1	23-year old	Trauma	Tooth 22	32 × 25 mm	1 mL of bloody serous exudate drained through the canal and gentle aspiration with a luer lock syringe and 30/06 needle blocking the access opening with a wet cotton pellet provided a further 2 mL of yellow serous exudate.	Four dressing changes over a period of 12 months.	C & R	S	14 months	No	None	• Periapical lesions of endodontic origin may develop asymptomatically and become large. • Proper biomechanical preparation followed by calcium hydroxide medication renewed periodically represents a nonsurgical approach to resolve extensive inflammatory periapical lesions.
Saeed Asgary et al. (2008)	CR	1	29-year-old	Poor endodontic root treatment with an incomplete obturation	Right maxillary first and second molars.	25 mm in diameter.	There were no exudates from the canals.	No mentioned.	C & R	S	12 months	No	None	In the present case, single visit root canal therapy without any intracanal medicament, proved successful in promoting healing of a large cyst-like periradicular lesion. The result confirms previous reports demonstrating that even large periradicular lesions can respond successfully to non-surgical single-visit endodontic treatment.
Soares et al. (2008）	CR	1	32-year old	Restoration	Maxillary left lateral incisor.	22 mm in diameter and nearly 389 mm2 in area.	4mL yellow serous exudate and 1mL of bloody serous exudate.	Six dressing changes over a period of 11 months.	C & R	S	24 months	No	None	Non-surgical treatment of this supposedly cystic, extensive periapical lesion provided favorable clinical and radiographic response.
Ali Keles et al. (2015)	CR	1	21-year-old	No mention.	Mandibular anterior.	About 31 × 14 mm on panoramic radiography.	An EndoVac (SybronEndo Corp, Orange, CA) negative pressure system was used to aspirate the exudate through the root canal of this tooth.	The patient was recalled weekly for 6 more appointments.	C & R	S	2 years	No	None	The healing of a large periapical lesion can be achieved by the correct diagnosis and the proper treatment approach, without the need for surgery. EndoVac negative irrigation system might be useful for intracanal aspiration of exudates.
Soares et al. (2016)	CR	15	23.4 ±5.6-year old	No mention.	Anterior, premolar and molar.	Ranged from 11 to 28 mm	Lesion decompression was completed through intracanal puncture under gentle aspiration with a Luer-Lock syringe and a 30/06 needle blocking the access cavity with a wet cotton pellet	Calcium Hydroxide/Chlorhexidine Intracanal Dressing every 2-4 weeks for the next 3-10 months (mean time interval, 6.2 months)	C & R	At the 24-month follow-up, 6 lesions (60.0%) had S, and 3 lesions (30.0%) were L, with the corresponding patients being without clinical signs or symptoms.	6-24 months	No	The case of treatment failure was submitted to surgical treatment. Microscopically, the lesion appeared to be an apical cyst with exuberant extraradicular bacterial biofilms attached to the sectioned root apex.	This case series supports the use of nonsurgical methods to resolve larger cyst-like periapical lesions.
Yong-Sik Cho and Il-Young Jung (2019)	CR	1	49-year-old	Porcelain-fused-to-metal (PFM) crowns, which had been placed 20 years prior due to proximal caries.	Teeth 8, 9, and 10.	Through-and-through lesion.	Simultaneous surgical drainage.	No interappointment intracanal calcium hydroxide (Ca[OH]2) dressing or passive ultrasonic irrigation was used during the procedure. 5.25% NaOCl was a minimum of 30 minutes.	C & R & CBCT	S	14 years	Yes	None	This case report indicates the potential for healing of large cystic lesions by nonsurgical root canal treatment.
a CR, case report; PCS, prospective cohort study.
b C&R, combined clinical and radiographic examination.
c S, strict criteria (complete resolution of peri-apical lesion); L, loose criteria (reduction in the size of existing peri-apical lesion).

## Sheet: Sheet1
Yadav et al.	1	18	Trauma	Maxilla	35 × 30	No drainage	940‑nm diode laser (Epic 10 Diode Laser; Biolase Inc., USA) applied with the wave length of 940 nm, output power of 2.5 W continuous wave mode, 10‑m s pulse duration, and 10‑m s pulse interval The laser was irradiated into the canals to a depth of 1 mm shorter than the actual root canal length, using an optical fber with a diameter of 200 µm. Calcium hydroxide (Dento Kem, Faridabad, India) was mi…	1 year	A complete healing	Low-Level Laser Therapy for Management of Large Periapical Lesions Associated with Open Apex Cases	Indian J Dent Res	\	2020
