# Supplementary material for: Homeostatic medicine, new thinking on etiological treatment of large cyst-like periapical lesions: Case series and literature review
Source: Research Square preprint supplement (doi:10.21203/rs.3.rs-6760722/v1), 2025-06-18
Supplement: Supplementary file 3 [file be170ac468ef07c280d99188.xlsx]

## Sheet: Table 1
Table 1. Studies in LCPLs‘ diameter between 10 mm to 20 mm.
Author （year）	Study design a	Sample size	Age (y)	Cause	Tooth type	Extent of periapical radiolucency (mm)	Drainage/Orthograde decompression	Calcium hydroxide intracanal dressing	Outcome assessment b	Outcome c	Follow-up	≥ 4 year follow-up	Reason for failure	Conclusion
M. K. Calıskan (2004)	CR	42	32 adults patients (17 men, 15 female)	Trauma was considered the most common aetiological factor in pulp death and the development of periapical lesions (22 teeth) followed by either caries or defective restorations.	Anterior teeth	From 7 to 18 mm in diameter	A clear, straw-coloured fluid exuded from the canals of all but six teeth. Aspiration of this fluid from inside root canal was made directly into a syringe with a 20 or 22-gauge needle. Drainage of the lesion took from 4 days to a month. Fluid samples from the lesions contained cholesterol crystals, which were identified by light microscopy.	Calcium hydroxide was not applied to the canal until active drainage ceased. The calcium hydroxide dressing was changed twice at 3-week intervals and maintained for 3 months.	C & R	S was observed in 73.8% and L in a further 9.5% of cases.	A period of 2–10 years	Yes	Root canal treatment failed in seven teeth. Possible causes of therapy failure included: overfilling (one case), occlusal trauma and advanced periodontal disease (two cases) and further traumatic injury (one case).	• Root canal treatment using calcium hydroxide as an antibacterial dressing was successful in healing large cyst-like periapical lesions. • This study suggests that the size of a periapical lesion is not a major determining factor in the decision to perform conventional root canal treatment or surgical removal of the lesion. Even large cyst-like periapical lesions containing cholesterol crystals …
M. Fernandes & I. De Ataide (2010)	CR	1	25-year-old man	Trauma	Teeth 11, 21 and 22	A large radiolucent lesion approximately 14 × 15 mm in diameter apparently involving the apices of teeth 21 and 22.	Drainage of yellow straw-coloured fluid from tooth 21. 4 mL of straw coloured fluid was aspirated whilst simultaneous digital pressure was applied on the swelling in the labial sulcus. The swelling decreased in size completely once the fluid evacuation was complete. The fluid was examined under the light microscope and was found to contain cholesterol crystals.	The periapical lesion in the above case report showed an estimated repair rate of 4 mm2 after 1 month. The fast repair rate in this case did not necessitate the placement of an intracanal medicament.	C & R	S	1 year 6 months	No	None	• Non-surgical techniques can aid in healing of periapical lesions. • Non-surgical approaches should be considered before resorting to surgery.
Sarang Sharma et al. (2018)	CR	3	Case one: a 39-year-old woman; case two: a 45-year-old woman; case three: a 15-year-old boy	Trauma	Upper anterior teeth	Case one: 16 × 9 × 13 mm; case two: 20 × 15 mm involving teeth 9 and 10; case three: 15 × 10 mm involving root apices of tooth 9 and tooth 10 apices of tooth 9 and tooth 10	Case one: straw-colored fluid discharge was present in tooth 9, but no discharge was noted in tooth 10; case two: frank purulent exudate was observed to emanate from the canal of tooth 9; case three: in tooth 9. frank purulent blood–stained discharge was noted.	1-step apexification for closure of the root apex by placing a preliminary barrier of platelet-rich fibrin (PRF) and a secondary barrier of Biodentine (Septodont, Saint-Maur-des-Foss_x0001_es, France).	C & R	Case one: S; case two: L; case three: L.	6 months	No	None	A collective approach strategy involving 1-step apexification using PRF and Biodentine and supplemented with lesion decompression under a stringent disinfection protocol proved highly successful in enabling teeth with open apices and large periapical/cystic lesions to return to a state of health and function without surgical intervention.
Fatih Aksoy (2019)	CR	89	Aged from 22 to 55	Trauma	57 mandibular and 32 maxillary anterior teeth	6-20mm	Drainage was achieved in 72 out of 89 teeth and 57 of the 72 teeth have no exude after the first appointment, and drainage were provided the remaining 15 teeth between 2rd and 24th days. Long-term drainage of this type was performed in every two days.	Calcium hydroxide dressing was replaced at 2-week intervals and kept for 2 months.	C & R	S was observed in 74 (83.1%), L in 7 (7.9%) and failure in 8 (9%) teeth in all cases at the end of 24-month assessment.	24 months	No	Basic endodontic treatment failed in 8 teeth (9%) and gone under surgery for apicoectomy.	Non-surgical endodontic treatment was greatly successful in the treatment of teeth with large periapical lesions and it should be considered before surgical procedure.
Ming-Ming Zhang et al. (2021)	PCS	58	Group one ＞ 45 years; group two＜ 45 years.	Retreatment	Anterior, premolar and molar.	Group one ＞ 65 mm3; group two ＜ 65 mm3.	No mention.	Root canals were dressed with calcium hydroxide paste (Multi-Cal; Pulpdent Corporation, Watertown, MA) for 1–2 weeks.	C & R & CBCT	The periapical radio lucencies were determined as S in 44 teeth (75.9%), L in 10 teeth (17.2%), unchanged in 1 tooth (1.7%), and enlargement in 3 teeth (5.2%).	4 years	Yes	Among these teeth, 2 were molars with preoperative canal transportation, and canal patency could not be achieved during retreatment. The other 2 teeth had sealer extrusion in retreatment. For these 4 teeth, surgical intervention was considered and recommended in subsequent planning.	The 4-year outcome of endodontic retreatment is predictable, with a significant volumetric reduction in periapical radiolucencies.
Roxana M. Talpos-Niculescu et al. (2021)	CR	2	Case one: a 18-year-old female patient; case two: a 54-year-old female	Case one: decay; case two: composite restorations	Case one: tooth 11; case two: Teeth 11, 21, and 22	Case one: 9.75 × 9.31 × 10.36 mm; case two: 12.1 × 8.26 × 12.49 mm	Case one: Microsurgical tips were used connected to the suction device of the dental unit to stimulate the drainage. Case two: suction with microcannulas was used to control the drainage.	Case one: three weeks; case two: three weeks	C & R & CBCT	Case one: L; case two: L	Case one: 12m; case two: 12m	No	None	• Endodontic treatment is the first choice option in the management of teeth with pulpal necrosis and large periapical cystic-like lesions. • Decompression is the only surgical procedure recommended when the canals cannot be dried and obturated. • Large surgical interventions are unnecessary in cases where endodontic treatment can be performed.
Aakriti Saini et al. (2022)	PCS	77	Aged from 18 to 50	Trauma	Permanent maxillary anterior teeth	>10 mm	To expedite the drainage, intracanal aspiration using a 5 mL disposable syringe and a 24-gauge needle was performed.	A slurry of calcium hydroxide (CH) (Merck KGaA) (CH powder mixed with 2% Lidocaine hydrochloride with 1:100 000 epinephrine [Lignospan; Septodont]) intracanal medicament (ICM) was placed to the work_x0002_ing length with an engine-driven Lentulo spiral filler (Dentsply Maillefer).	C & R & CBCT	The success rate of RCT was 82.2% (8.9% S, 73.3% L).	24 months	No	In the present study, only three cases required surgical intervention and were diagnosed as a radicular cyst (0.05%).	Large cyst-like periapical lesions may be successfully managed with RCT. Preoperative cortical bone defect and apical extent of obturation may negatively influence osseous healing.
a CR, case report; PCS, prospective cohort study.
b C&R, combined clinical and radiographic examination.
c S, strict criteria (complete resolution of peri-apical lesion); L, loose criteria (reduction in the size of existing peri-apical lesion).
