# Supplementary material for: Homeostatic medicine, new thinking on etiological treatment of large cyst-like periapical lesions: Case series and literature review
Source: Research Square preprint supplement (doi:10.21203/rs.3.rs-6760722/v1), 2025-06-18
Supplement: Supplementary file 4 [file c9113934d472ceeec9c36cf3.docx]

**Supplemental Table 1: Electronic Database Searches**

| **Pubmed: 2123 results (English)** |
| --- |
| (("root canal"[tw] OR "root canals"[tw] OR “apical periodontitis” [tw] OR "periapical pathology"[tw] OR “periapical periodontitis” [tw] OR "root canal therapy"[MeSH Terms] OR "Root Canal Preparation"[MeSH Terms] OR "periapical periodontitis"[MeSH Terms] OR "periapical diseases"[MeSH Terms] OR "dental pulp diseases"[MeSH Terms]) AND ("prognosis"[MeSH:noexp] OR "treatment outcome"[MeSH Terms] OR "success"[tw] OR “evaluation” [tw] OR "prognosis"[tw])) AND ((cohort studies[mesh:noexp] OR longitudinal studies[mesh:noexp] OR follow-up studies[mesh:noexp] OR prospective studies[mesh:noexp] OR retrospective studies[mesh:noexp] OR Cohort [TIAB] OR longitudinal [TIAB] OR prospective [TIAB] OR retrospective [TIAB]) OR ("Clinical Trial"[PT:noexp] OR "clinical trial, phase i"[pt] OR "clinical trial, phase ii"[pt] OR "clinical trial, phase iii"[pt] OR "clinical trial, phase iv"[pt] OR "controlled clinical trial"[pt] OR "multicenter study"[pt] OR "randomized controlled trial"[pt] OR "Clinical Trials as Topic"[mesh:noexp] OR "clinical trials, phase i as topic"[MeSH Terms:noexp] OR "clinical trials, phase ii as topic"[MeSH Terms:noexp] OR "clinical trials, phase iii as topic"[MeSH Terms:noexp] OR "clinical trials, phase iv as topic"[MeSH Terms:noexp] OR "controlled clinical trials as topic"[MeSH Terms:noexp] OR "randomized controlled trials as topic"[MeSH Terms:noexp] OR "early termination of clinical trials"[MeSH Terms:noexp] OR "multicenter studies as topic"[MeSH Terms:noexp] OR "Double-Blind Method"[Mesh] OR ((randomized [TIAB] OR randomized [TIAB]) AND (trial [TIAB] OR trials[tiab])) OR ((single [TIAB] OR double [TIAB] OR doubled [TIAB] OR triple [TIAB] OR tripled [TIAB] OR treble [TIAB] OR trebled [TIAB]) AND (blind*[TIAB] OR mask*[TIAB])) OR ("4 arm"[tiab] OR "four arm"[tiab]))) **1/1/2003-7/31/2023.** |
| *tw: text word. +MeSH: Medical Subject Headings. ±TIAB: Title/ Abstract. §PT: publication type |
| **EMBASE (Ovid): 929 results (English)** |
| ("root canal".mp. OR "root canals".mp. OR (apical periodontitis.mp.) OR (periapical pathology.mp.) OR (periapical periodontitis.mp.) OR (exp "tooth root canal"/) OR exp tooth periapical disease/ OR exp tooth pulp disease/ OR exp tooth periapical disease/ OR exp endodontic procedure/ OR exp "root canal preparation"/) AND ((success or evaluation or prognosis).mp. or prognosis/ or treatment outcome/ or outcome assessment/) AND (Cohort analysis/or (Cohort adj (study or studies)).mp. or (Case control adj (study or studies)). tw. or (follow up adj (study or studies)).tw. or (observational adj (study or studies)).tw. or (epidemiologic adj (study or studies)).tw. or (cross sectional adj (study or studies)).tw.) OR (Clinical study/ or Case control study/ or Family study/ or Longitudinal study/ or Retrospective study/) OR (Prospective study/ not Randomized controlled trials/)) **1/1/2003-7/31/2023.** |
| *mp= multi-purpose. +exp: explosion search. ±adj: adjacency. §tw: textword. |
| **CINAHL (Ebsco): 726 results (English)** |
| (TX root canal OR TX root canals OR TX apical periodontitis OR TX periapical pathology OR TX periapical periodontitis OR TX root canal therapy OR TX periapical diseases OR TX dental pulp diseases ) AND ( TX success OR TX evaluation OR TX prognosis OR TX outcome assessment OR TX treatment outcome ) AND ( TX Prospective studies OR TX case control studies OR TX Correlational studies OR TX Nonconcurrent prospective studies OR TX Cross sectional studies OR TX (cohort study) OR (cohort studies) OR TX (observational study) OR (observational studies) OR TX clinical trial OR TX clinical trials) **1/1/2003-7/31/2023.** |
| *TX: All Text. |
| **Cochrane Central Register of Controlled Trials (Ovid): 216 Results (English)** |
| ("root canal" or "root canals" or "apical periodontitis" or "periapical pathology" or "periapical periodontitis" or "tooth root canal" or "tooth periapical disease" or "tooth pulp disease" or "tooth periapical disease" or "endodontic procedure" or "root canal preparation").mp. and (success or evaluation or prognosis or "treatment outcome" or "outcome assessment").mp. and ("Prospective studies" or "case control studies" or "Correlational studies" or "Nonconcurrent prospective studies" or "Cross sectional studies" or "cohort study" or "cohort studies" or "observational study" or "observational studies" or "clinical trial" or "clinical trials").mp. **1/1/2003-7/31/2023.** |
| *mp= multi-purpose |
| **Web of Science: 884 results (English)** |
| ("root canal" OR "root canals" OR "apical periodontitis" OR "periapical pathology" OR "periapical periodontitis" OR "tooth root canal" OR "tooth periapical disease" OR "tooth pulp disease" OR "tooth periapical disease" OR "endodontic procedure" OR "root canal preparation") AND (success or evaluation or prognosis or "treatment outcome" or "outcome assessment") AND ("Prospective studies" OR "case control studies" OR "Correlational studies" OR "Nonconcurrent prospective studies" OR "Cross sectional studies" OR "cohort study" OR "cohort studies" OR "observational study" OR "observational studies" OR “clinical trial” OR “clinical trials”) **1/1/2003-7/31/2023.** |
